# Supplementary material
Source: PubMed Central journal article supplement (PMC4104984)
Supplement: NIHMS594179-supplement-1.pdf [file NIHMS594179-supplement-1.pdf]

**Supplementary Table 1 : Murine *Fam132b* Promoter Analysis 3k ([Link to Supplementary Table 1 Murine Fam132b Erythroferrone Promoter Analysis 3k.xlsx](#) Excel spreadsheet)**

**Supplementary Table 2: qRT-PCR primers**

| Transcript           | Forward primer                 | Reverse primer              |
|----------------------|--------------------------------|-----------------------------|
| Mouse <i>Hprt</i>    | CTG-GTT-AAG-CAG-TAC-AGC-CCC-AA | CAG-GAG-GTC-CTT-TTC-ACC-AGC |
| Mouse <i>Rpl4</i>    | TGA-AAA-GCC-CAG-AAA-TCC-AA     | AGT-CTT-GGC-GTA-AGG-GTT-CA  |
| Mouse <i>Hamp</i>    | TTG-CGA-TAC-CAA-TGC-AGA-AGA    | GAT-GTG-GCT-CTA-GGC-TAT-GTT |
| Mouse <i>Fam132b</i> | ATG-GGG-CTG-GAG-AAC-AGC        | TGG-CAT-TGT-CCA-AGA-AGA-CA  |
| Mouse <i>Id1</i>     | ACC-CTG-AAC-GGC-GAG-ATC-A      | TCG-TCG-GCT-GGA-ACA-CAT-G   |
| Mouse <i>Saa1</i>    | AGT-CTG-GGG-TGC-TGA-GAA-AA     | ATG-TCT-GTT-GGC-TTC-CTG-GT  |
| Mouse <i>Gypa</i>    | ATG-GCA-GGG-ATT-ATC-GGA-AC     | CAC-CCT-CAG-GAG-ATT-GGA-TG  |
| Human <i>HPRT</i>    | CAG-CAG-TGA-GCT-CTT-CAC-CA     | CAA-GAA-CAC-GGA-GGT-CCA-CT  |
| Human <i>FAM132B</i> | GCC-CTG-GCG-TCG-TGA-TTA-GT     | AGC-AAG-ACG-TTC-AGT-CCT-GTC |

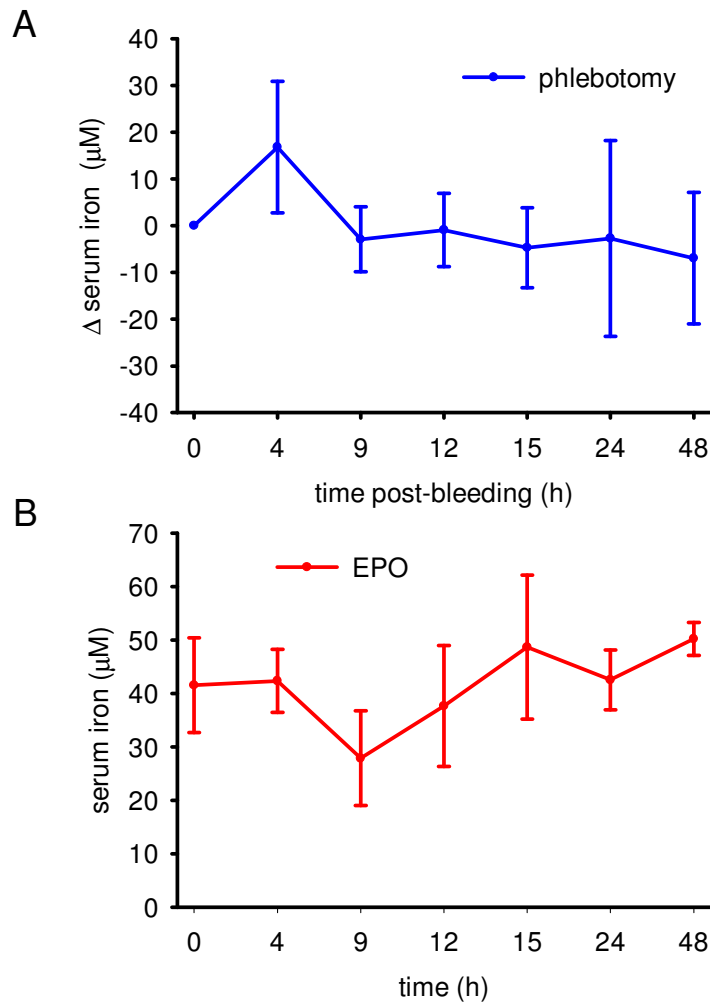

**Supplementary Figure 1: Serum iron levels after erythropoietic stimulation.** Changes in serum iron levels between paired samples from the initial phlebotomy and terminal analysis (blue line) **(A)** and serum iron concentrations after EPO injection (red line) **(B)** in 6 week-old C57BL/6 mice. No significant changes in serum iron concentrations were observed. Values shown are means  $\pm$  standard deviation. For each time-point, means of serum iron changes were compared to the initial value (zero) (A) or serum iron concentrations were compared to untreated t=0 mice (B) by two-tailed Student t-test (n=4 per group).

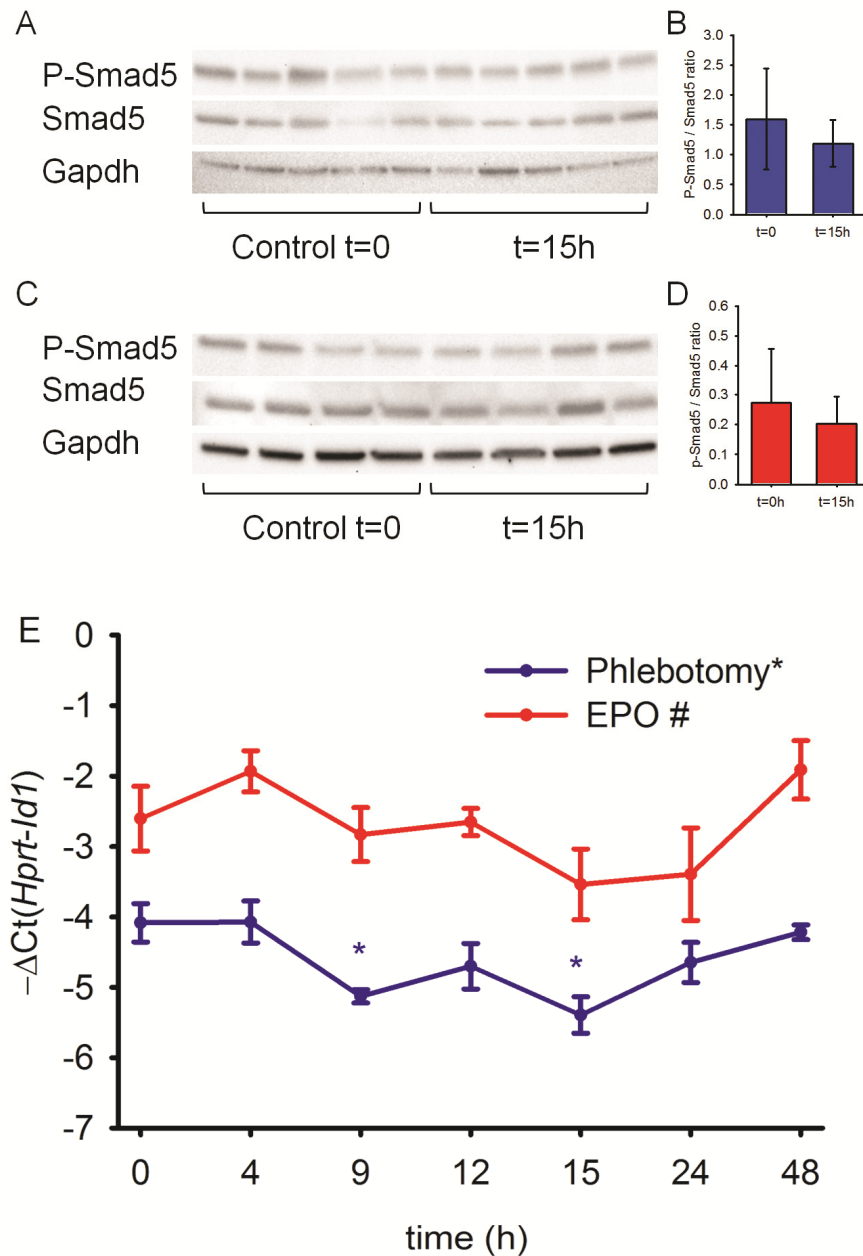

**Supplementary Figure 2: Smad5 phosphorylation and *Id1* mRNA expression in response to erythropoietic stimulation.** (A) Smad5 phosphorylation was compared by western blot in the livers of wild-type Sv129/C57BL/6 mice at 0 and 15 hours after phlebotomy. (B) Densitometric ratio of phosphorylated Smad5 to total Smad5 for phlebotomized mice. Means ± SEM are shown. (C) Smad5 phosphorylation was compared by western blot in the livers of wild-type C57BL/6 mice at 0 and 15 hours after EPO injection. (D) Densitometric ratio of phosphorylated Smad5 to total Smad5 for the EPO-treated mice. Means ± SEM are shown. (E) Inhibitor of DNA binding 1 (*Id1*) mRNA was measured in 6 week-old C57BL/6 wild-type males after phlebotomy (blue line) or EPO injection (red line) and was only slightly decreased within 9 hours after phlebotomy but not significantly after EPO injection. *Id1* mRNA levels were measured by qRT-PCR. Values shown are means ± SEM of  $-\Delta\text{Ct}$  (i.e.,  $\text{Ct } Hprt - \text{Ct } Id1$ ) and were compared for each time-point to the control mice by two-tailed Student t-test (n=4). \*p<0.05.

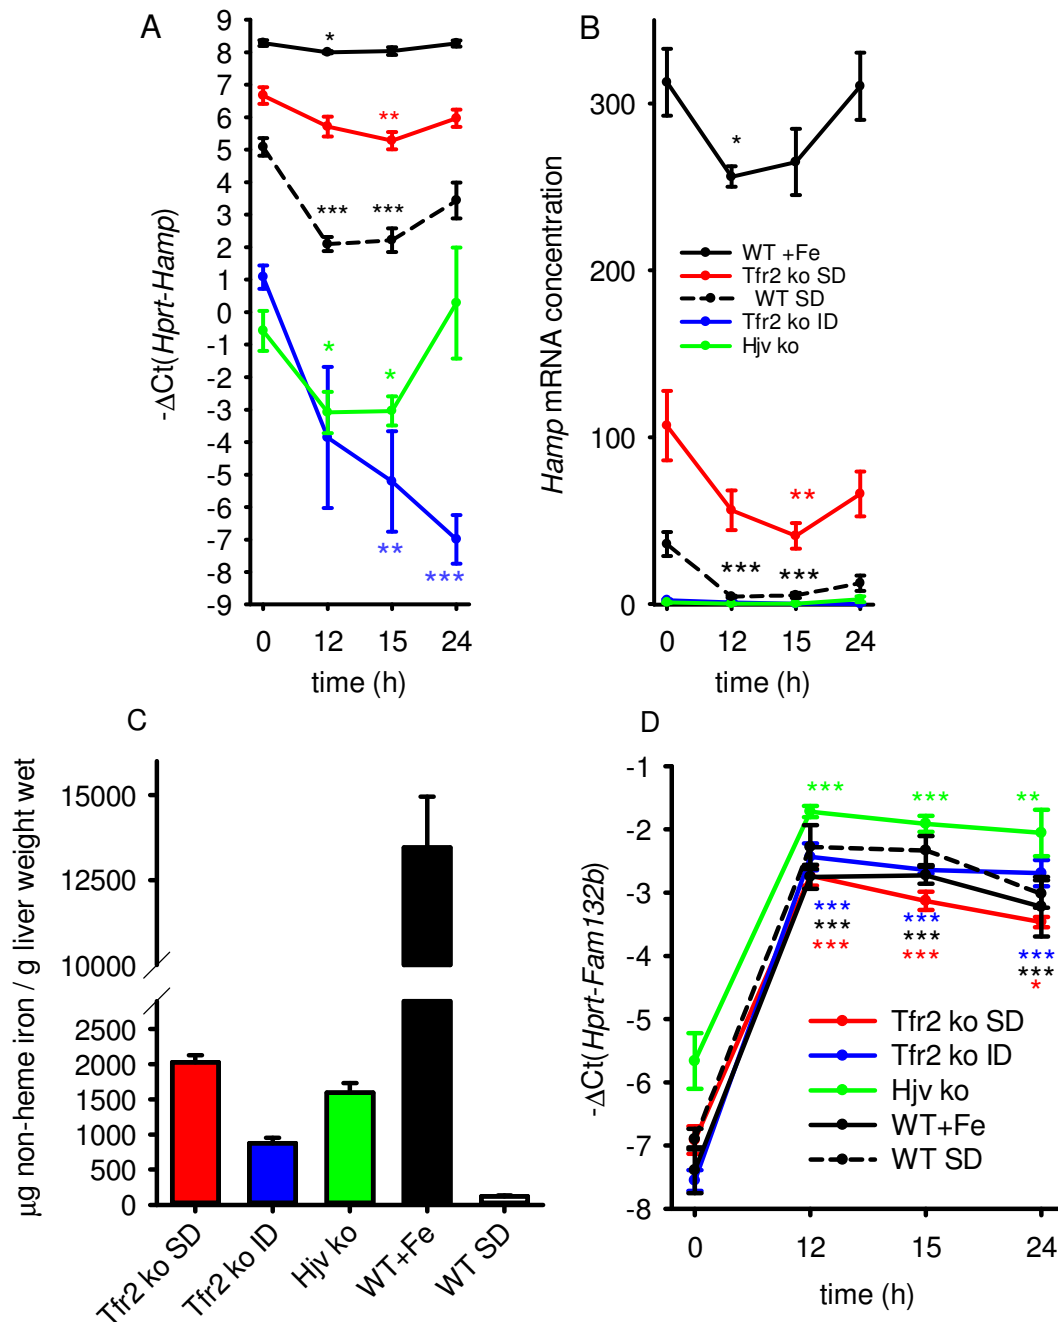

**Supplementary Figure 3: Hepcidin suppression by increased erythropoietic activity is independent of the effect of the BMP pathway.** (A and B) Hepcidin (*Hamp*) mRNA response to bleeding in 6 week-old males *Tfr2*<sup>Y245X</sup> on standard diet 336 ppm Fe (Tfr2 ko SD, red line) or iron-deficient diet containing 4 ppm Fe for 2 weeks after weaning (Tfr2 ko ID, blue line), *Hvj*-deficient mice (*Hvj* ko, green line), 7 week-old C57BL/6 WT mice treated with 50 mg iron-dextran (WT+Fe, black line) and 6 week-old C57BL/6 WT mice (also shown in Figure 1) as a reference (dashed black line). (A) *Hamp* mRNA level is shown on a logarithmic scale as  $-\Delta Ct$  (i.e.,  $Ct\ Hprt - Ct\ Hamp$ ) measured by qRT-PCR. (B) Relative *Hamp* transcript abundance was calculated as  $2^{-\Delta Ct(Hprt - Hamp)}$  and represented on a linear scale. (C) Liver iron content and (D) *Fam132b* mRNA levels in the bone marrow were measured in the same groups of mice. Values shown are means  $\pm$  SEM and were compared for each time-point to the control  $t=0$  mice by two-tailed Student t-test ( $n=4$  mice per group and time point). \*\*\* $p<0.001$ , \*\* $p<0.01$ , \* $p<0.05$ .

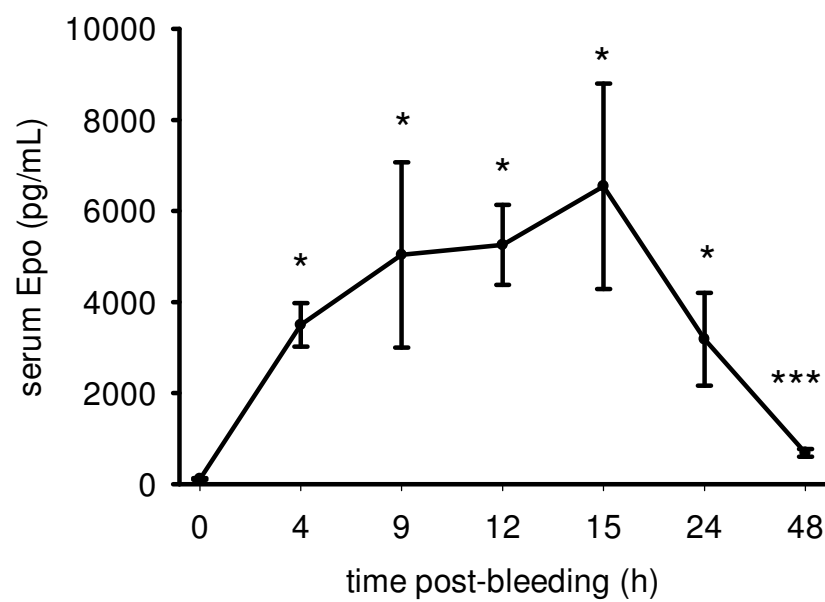

**Supplementary Figure 4: Serum erythropoietin levels after erythropoietic stimulation.** Serum Epo levels were measured in 6 week-old C57BL/6 wild-type males after phlebotomy and in control mice. Epo levels are rapidly increased within 4 hours and start to decrease after 15 hours. Values shown are means  $\pm$  SEM. Means of serum Epo values were compared for each time-point to the t=0 control mice by two-tailed Student t-test (n=4 mice per group and time point). \*\*\*p<0.001, \*p<0.05.

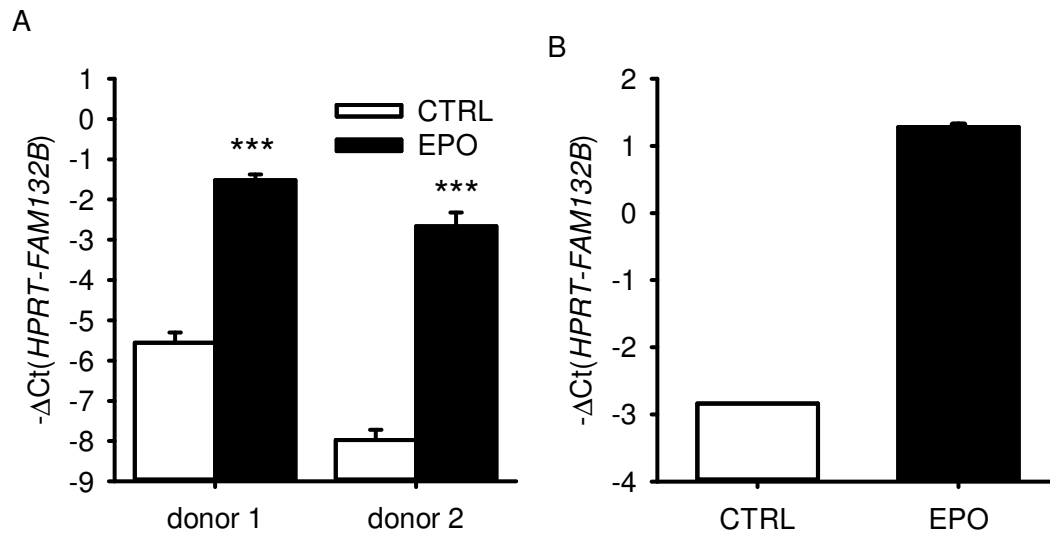

**Supplementary Figure 5: Erythroferrone is induced by EPO in human erythroblasts.** *FAM132B* mRNA expression was induced between 16 to 40-fold in human fetal erythroblasts (**A**) and 16-fold in erythroblasts from human adult bone marrow (**B**) 15 hours after treatment with erythropoietin (10 U/mL). Cells from three different donors were analyzed individually. Mean values  $\pm$  SEM of 6 (donor 1), 3 (donor 2) or 2 (bone marrow) replicates where  $-\Delta Ct$  (i.e.,  $Ct\ HPRT - Ct\ FAM132B$ ) were compared between untreated and treated cells by two-tailed Student t-test. \*\*\* $p < 0.001$

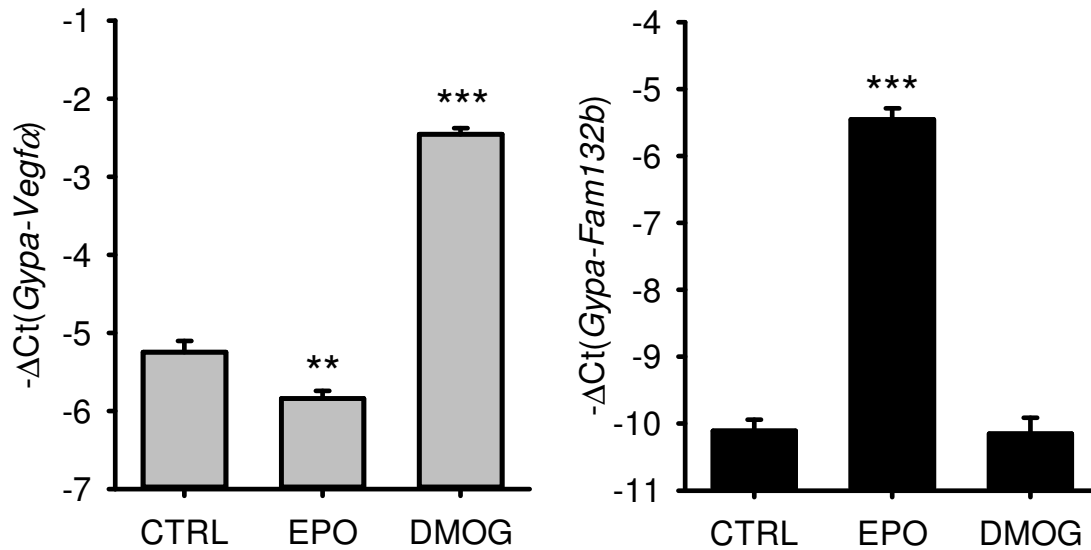

**Supplementary Figure 6: Erythroferrone *Fam132b* mRNA expression is not influenced by the hypoxia pathway.** Vascular endothelial growth factor  $\alpha$  (*Vegfa*) and *Fam132b* mRNA expression were compared in mouse bone marrow 15 hours after treatment with 10 U/mL EPO or 1 mM DMOG (Dimethyloxallylglycine, N-(Methoxyoxoacetyl)-glycine methyl ester). As *Vegfa* mRNA expression (a marker of hypoxia) was induced 15 hours after treatment with DMOG, *Fam132b* mRNA levels remained unchanged. EPO treatment is shown as a positive control to show the cells responsiveness. Mean values  $\pm$  SEM of  $-\Delta Ct$  (i.e.,  $Ct\ Gypa - Ct\ Vegfa$  or  $Fam132b$ ) were compared between control and EPO or DMOG treated cells by two-tailed Student t-test. Results are shown from three independent experiments, each done in triplicate. \*\*\*p<0.001, \*\*p<0.01.

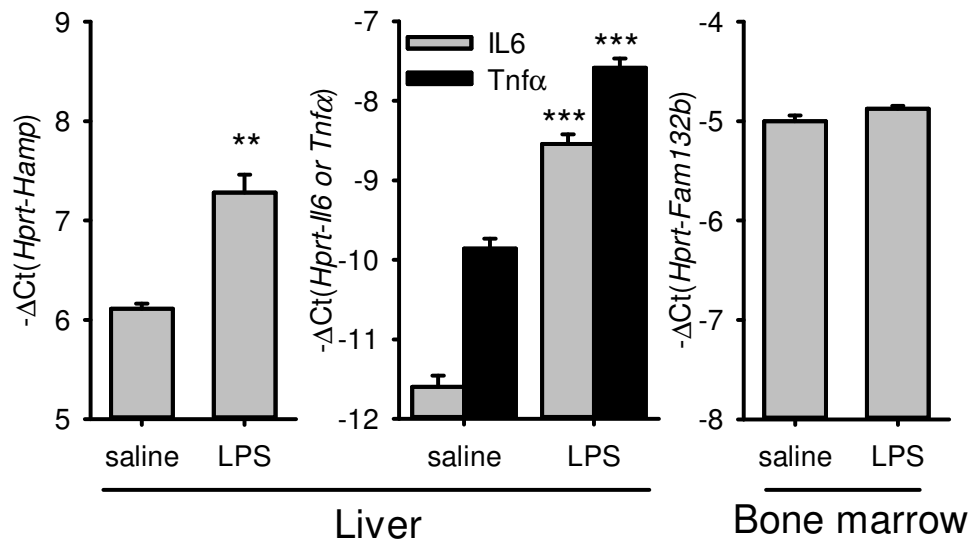

**Supplementary Figure 7: Erythroferrone *FAM132B* mRNA expression is not influenced by systemic inflammation.** Liver *Hamp*, *Il-6* and *Tnfα*, and bone marrow *Fam132b* mRNA levels in 6 week-old C57BL/6 mice (n=3 mice per group) were compared between mice injected with saline or with LPS (Sigma 055:B5, 1μg/g) 4 hours after treatment. As hepcidin, *Il-6* and *Tnfα* mRNA expression was induced 4 hours after LPS injection, bone marrow *Fam132b* levels remained unchanged. Mean values  $\pm$  SEM of  $-\Delta Ct$  (i.e.,  $Ct\ Hprt - Ct\ Hamp$ , *Il-6*, *Tnfα* or *Fam132b*) were compared between saline and LPS treated mice by Student t-test. \*\*\*p<0.001, \*\*p<0.01.

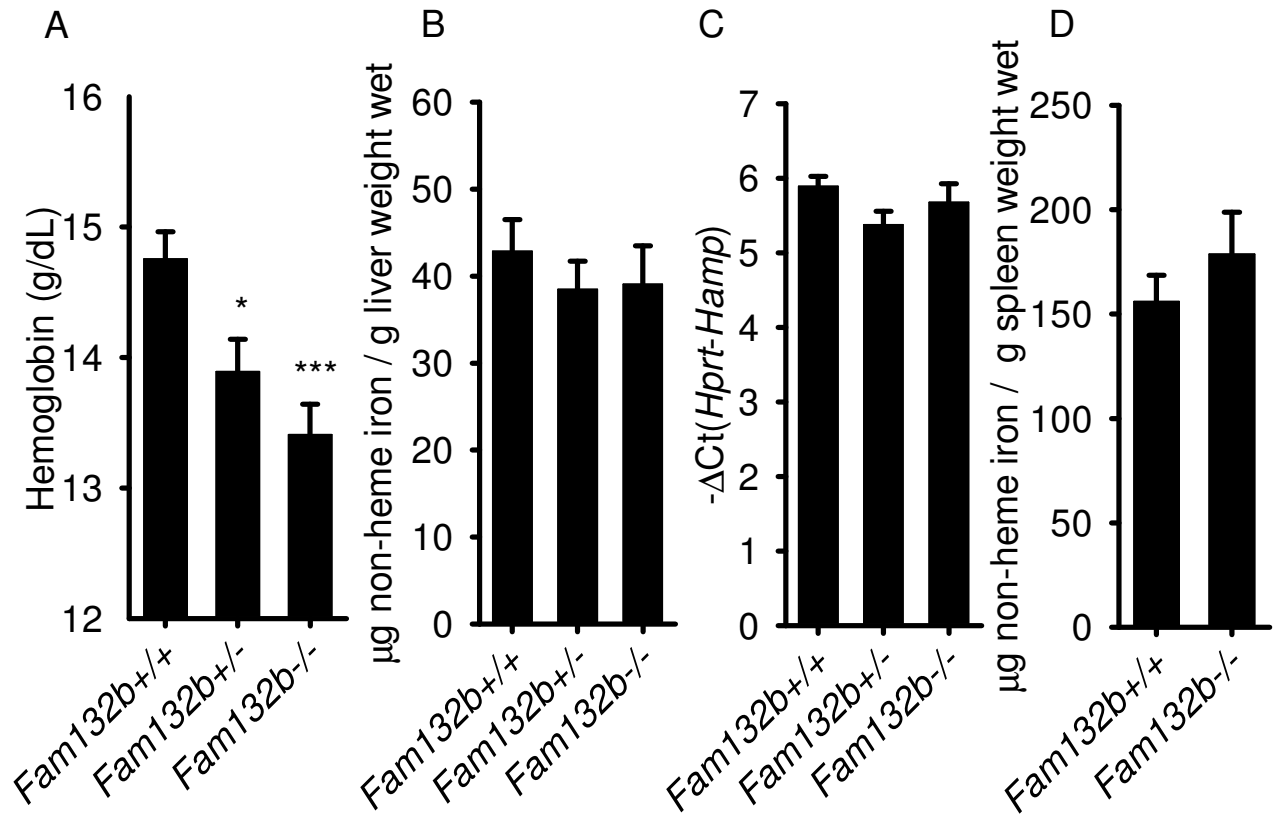

**Supplementary Figure 8: 6-week old ERFE-deficient mice have normal iron stores and hepcidin expression but have reduced hemoglobin levels compared to wild-type mice.** Hemoglobin (A), liver iron (B) and liver hepcidin (*Hamp*) mRNA levels (C) were measured in 6 week-old *Fam132b*<sup>+/+</sup>, *Fam132b*<sup>+/-</sup> and *Fam132b*<sup>-/-</sup> littermates. Spleen iron levels (D) were compared between *Fam132b*<sup>+/+</sup> and *Fam132b*<sup>-/-</sup> mice. The graphs show means  $\pm$  SEM. Because no gender differences were observed, the genders were combined for each parameter. All comparisons were done by two-tailed Student t-test (n=11 to 14). \*\*\*p<0.001, \*p<0.05

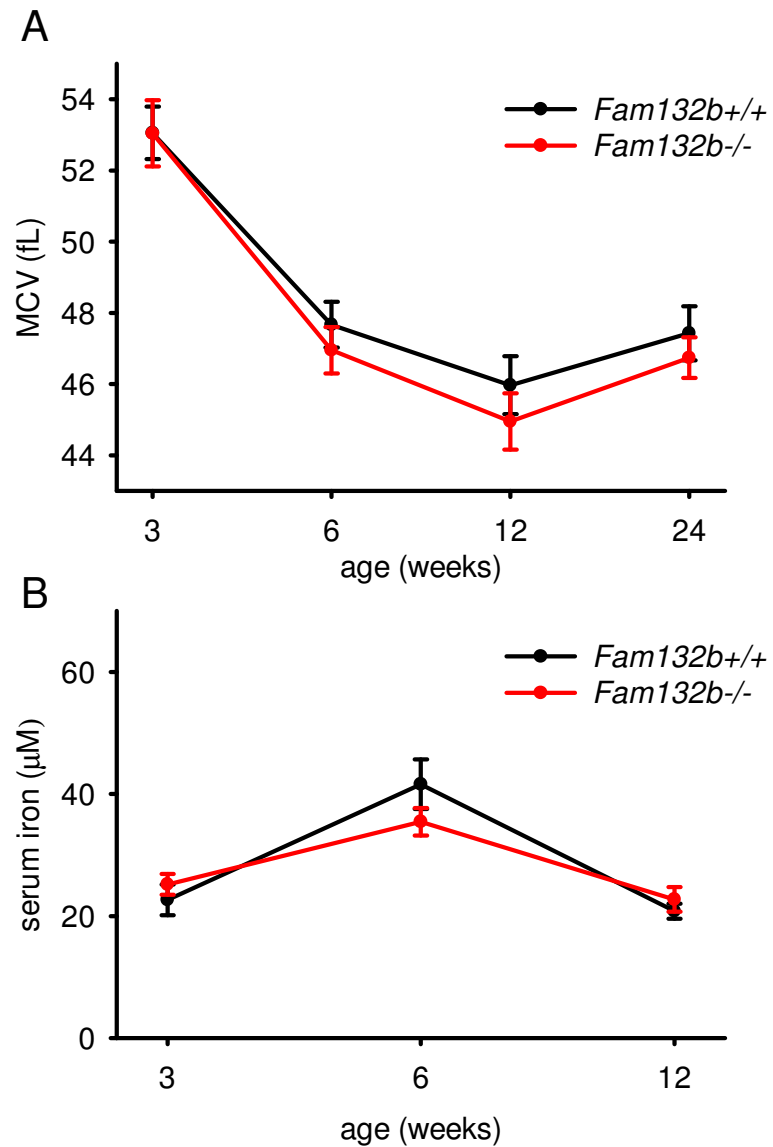

**Supplementary Figure 9: ERFE-deficient mice have normal mean corpuscular volume (MCV) and serum iron concentrations.** MCV (**A**) and serum iron concentrations (**B**) were compared at various ages in *Fam132b*<sup>-/-</sup> mice (red line) and wild-type mice (black line). The graphs show mean values  $\pm$  SEM, with n= 8-16 mice per time point and genotype. No statistically significant difference was observed between WT and KO by Student t-test.

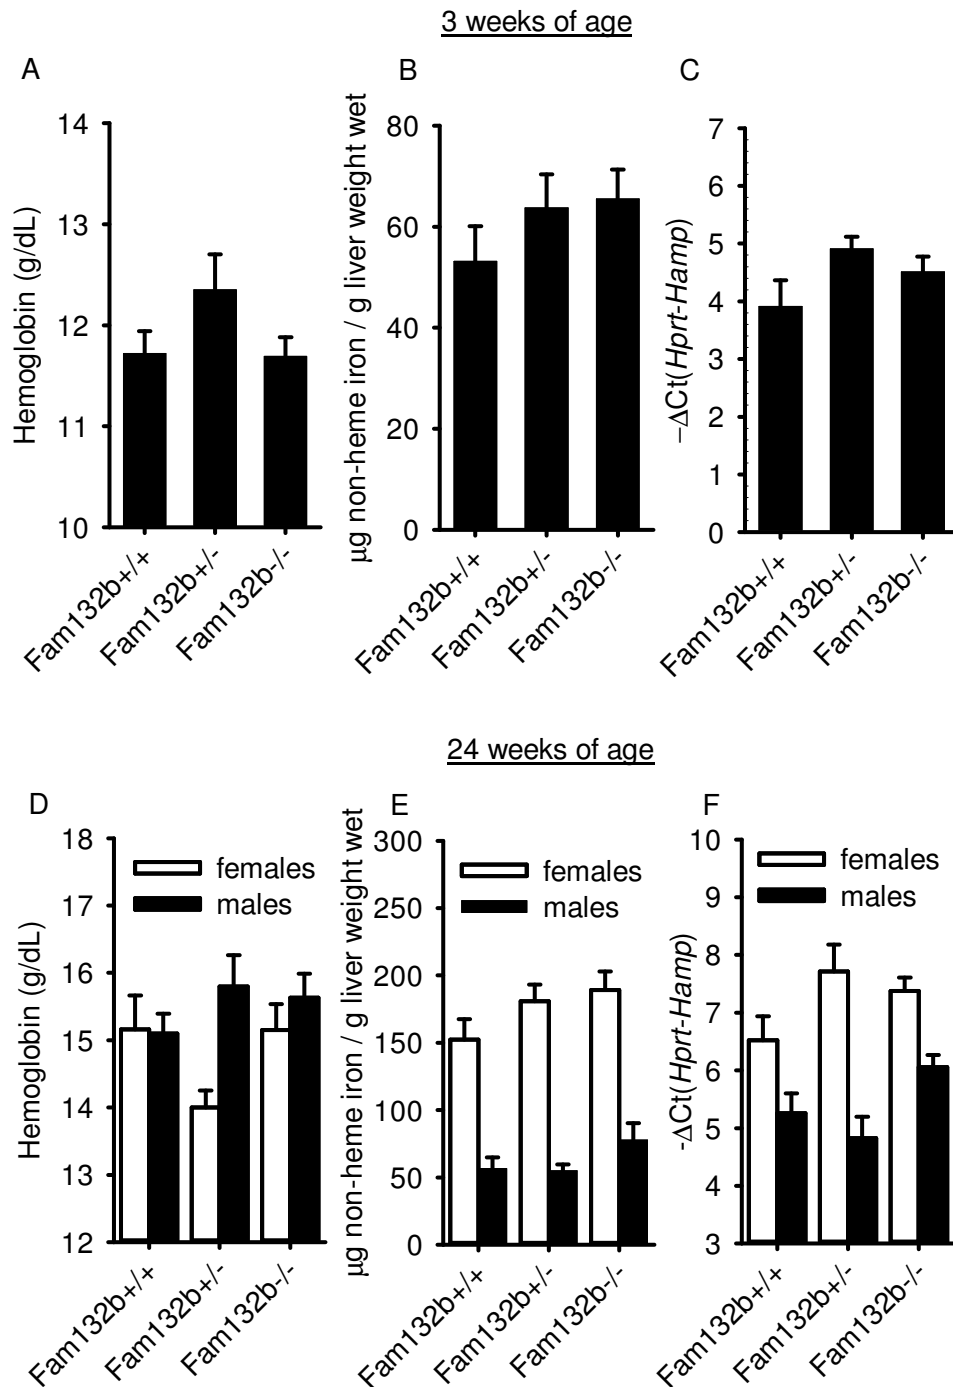

**Supplementary Figure 10: ERFE-deficient mice have normal hemoglobin, iron stores and hepcidin at 3 and 24 weeks of age.** Hemoglobin (**A, D**), liver iron (**B, E**) and liver hepcidin (*Hamp*) mRNA levels (**C, F**) were measured in 3 week-old (**A, B, C**) and 6 month-old (**D, E, F**) *Fam132b*<sup>+/+</sup>, *Fam132b*<sup>+/-</sup> and *Fam132b*<sup>-/-</sup> littermates. No significant differences were observed between genotypes. Values shown for hepcidin expression are means  $\pm$  SEM of  $-\Delta\text{Ct}$  (i.e.,  $\text{Ct } Hprt - \text{Ct } Hamp$ ). Mean values in hemoglobin, liver iron and hepcidin levels were compared between each genotype by two-tailed Student t-test. In the absence of gender differences at 3 weeks of age, the genders were combined for each parameter (n=9 to 12). Gender-separated study was performed at 6 months of age as females have higher liver stores than males (n=3 to 11).

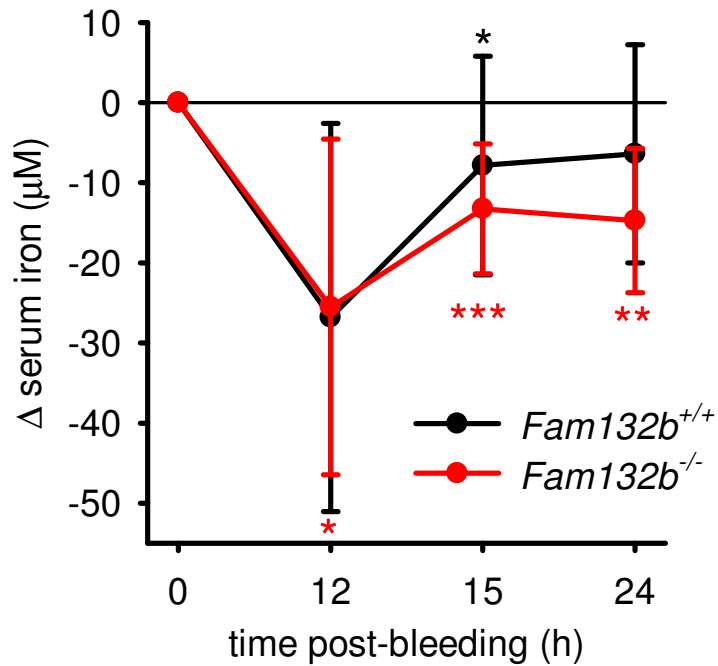

**Supplementary Figure 11: Serum iron concentrations in ERFE-deficient mice in response to phlebotomy.** Changes of serum iron from the initial phlebotomy levels to the end time point were compared for each mouse in *Fam132b*<sup>+/+</sup> (black line) and *Fam132b*<sup>-/-</sup> (red line) littermates (n=8 to 14 per genotype and time-point). Serum iron levels were significantly decreased at all time points in *Fam132b*<sup>-/-</sup> mice but not in *Fam132b*<sup>+/+</sup> confirming that the lack of hepcidin suppression after phlebotomy leads to impaired iron regulation. Values shown are means  $\pm$  standard deviation. Means of serum iron values were compared for each time-point to the control mice by two tailed Student t-test. \*\*\*p<0.001, \*\*p<0.01, \*p<0.05

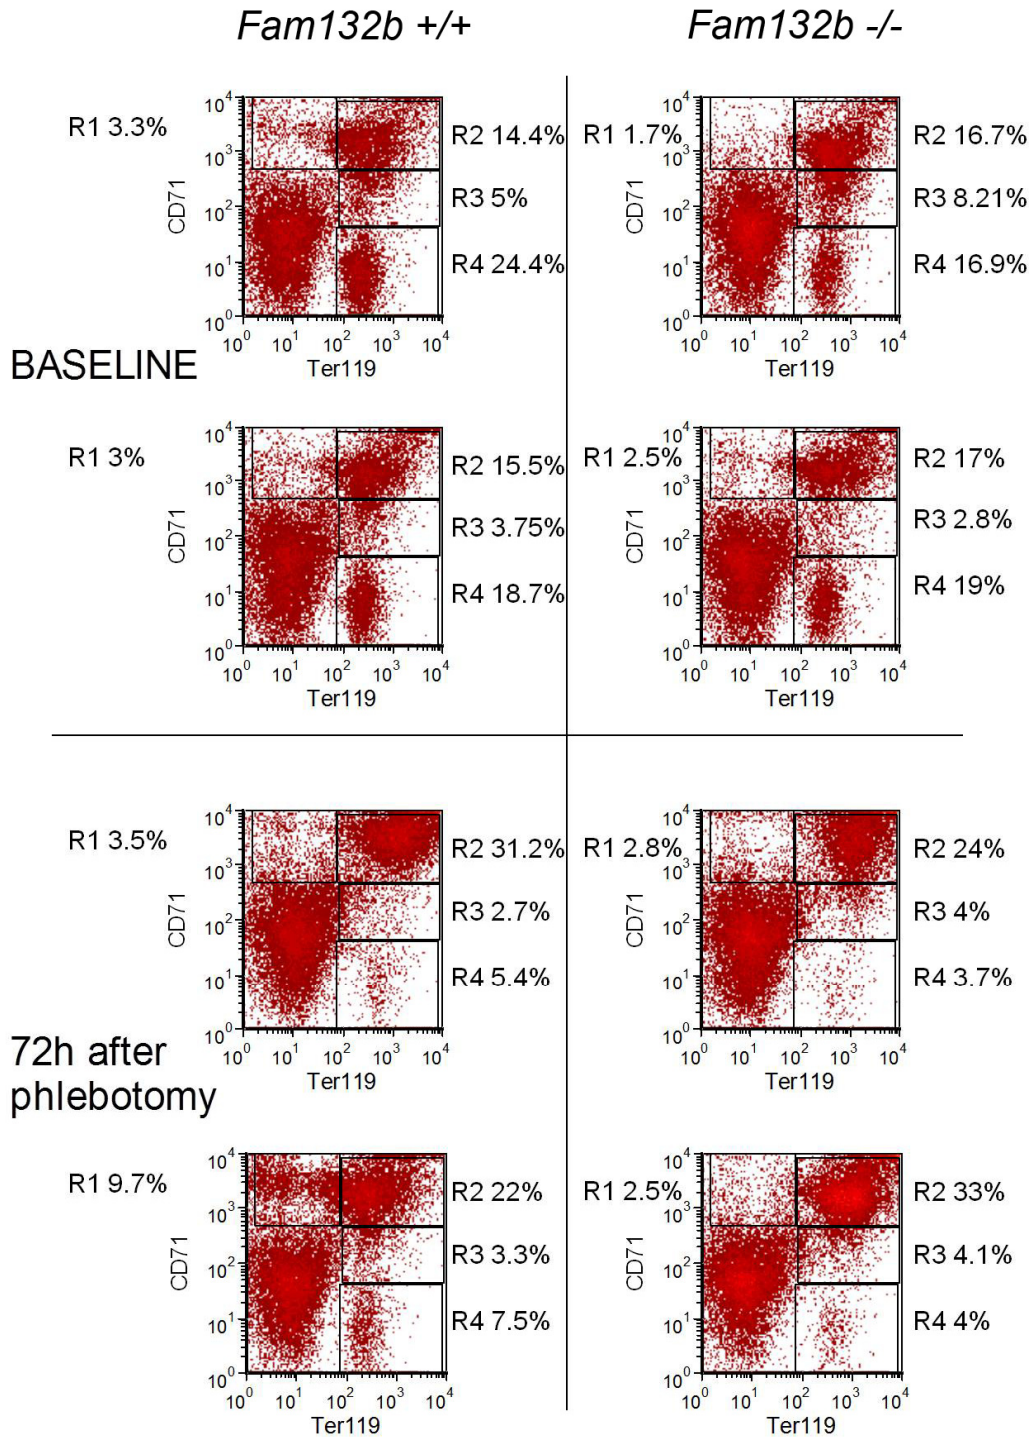

**Supplementary Figure 12: ERFE is not required for erythroblast differentiation during stress erythropoiesis.** Mouse bone marrow erythroblasts of *Fam132b*<sup>+/+</sup> and *Fam132b*<sup>-/-</sup> mice were analyzed by flow cytometry in control mice and mice 72h after phlebotomy (2 mice per group are shown). No significant difference in erythroblasts differentiation was observed between *Fam132b*<sup>+/+</sup> and *Fam132b*<sup>-/-</sup> mice. Flow cytometry data were analyzed using FCS express software (DeNovo software).

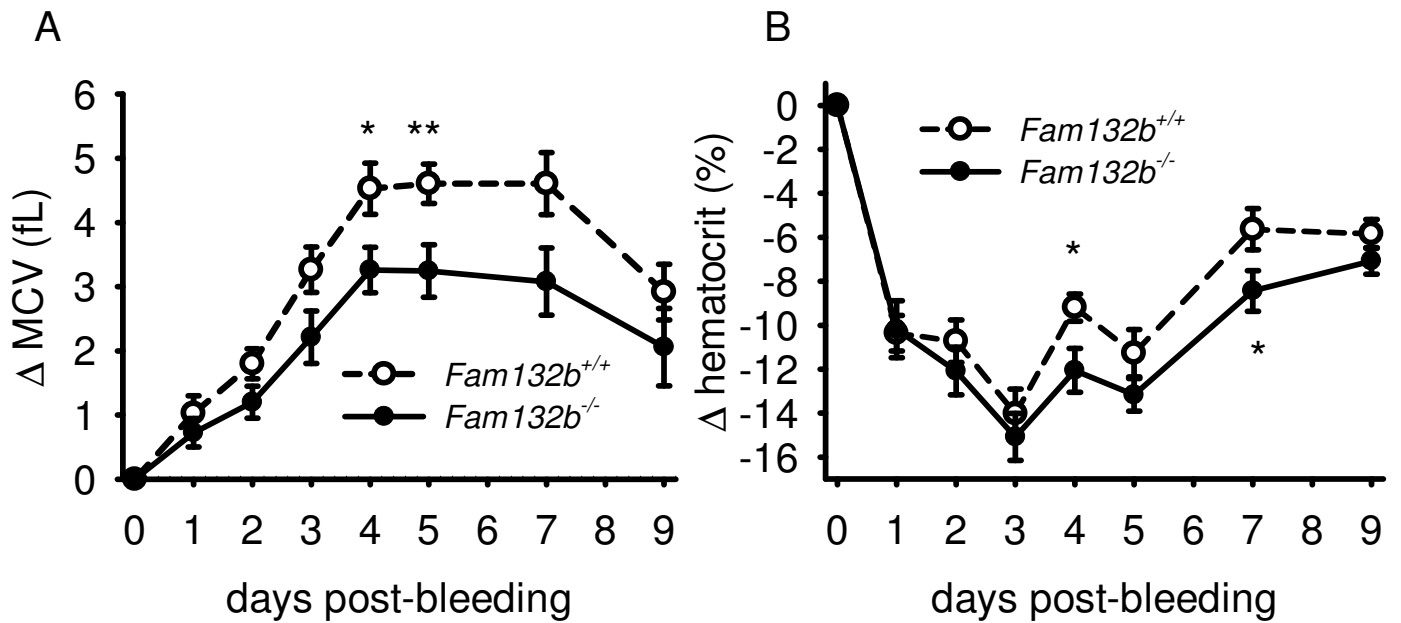

**Supplementary Figure 13: ERFE-deficient mice show lower MCV and hematocrit during recovery from anemia.** Eight week-old phlebotomized *Fam132b*<sup>-/-</sup> mice (solid line) had lower mean corpuscular volume (MCV) (**A**) and hematocrit (**B**) compared to wild-type mice (dashed line). Hematological parameters (**A**, **B**) were compared for each measurement between WT and KO by two tailed Student t-test (n=15 to 17). The graphs show means  $\pm$  SEM. In the absence of gender differences, the genders were combined for each parameter. \*\*p<0.01, \*p<0.05. See also Figure 4 in the manuscript.

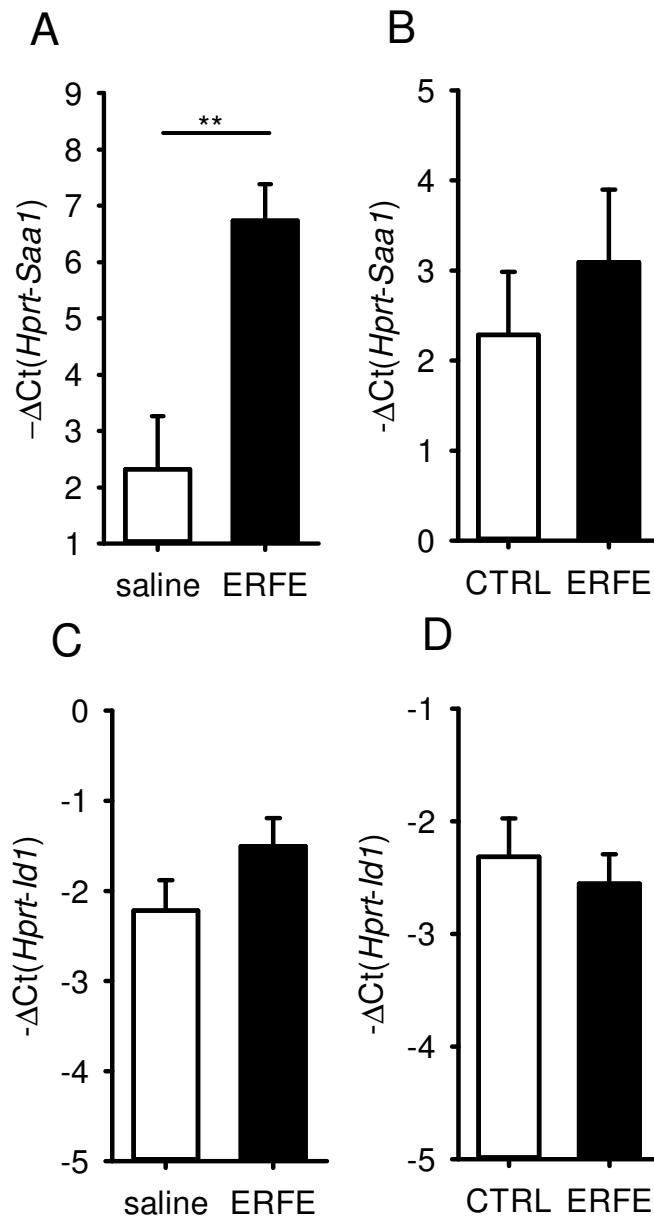

**Supplementary Figure 14: *Saa1* and *Id1* expression in ERFE-treated mice.** Liver *Saa1* and *Id1* mRNA (**A, C**) expression was measured in mice treated with recombinant ERFE (n=6) or saline (n=6) for 15 hours. Liver *Saa1* and *Id1* mRNA (**B, D**) was measured in mice expressing ERFE-lentivirus (n=8) or control lentivirus (n=7) for 3 weeks. Mean values  $\pm$  SEM of  $-\Delta\text{Ct}$  (i.e.,  $\text{Ct } Hprt - \text{Ct } Id1$  or  $Saa1$ ) were compared between control and ERFE-treated mice by two-tailed Student t-test.

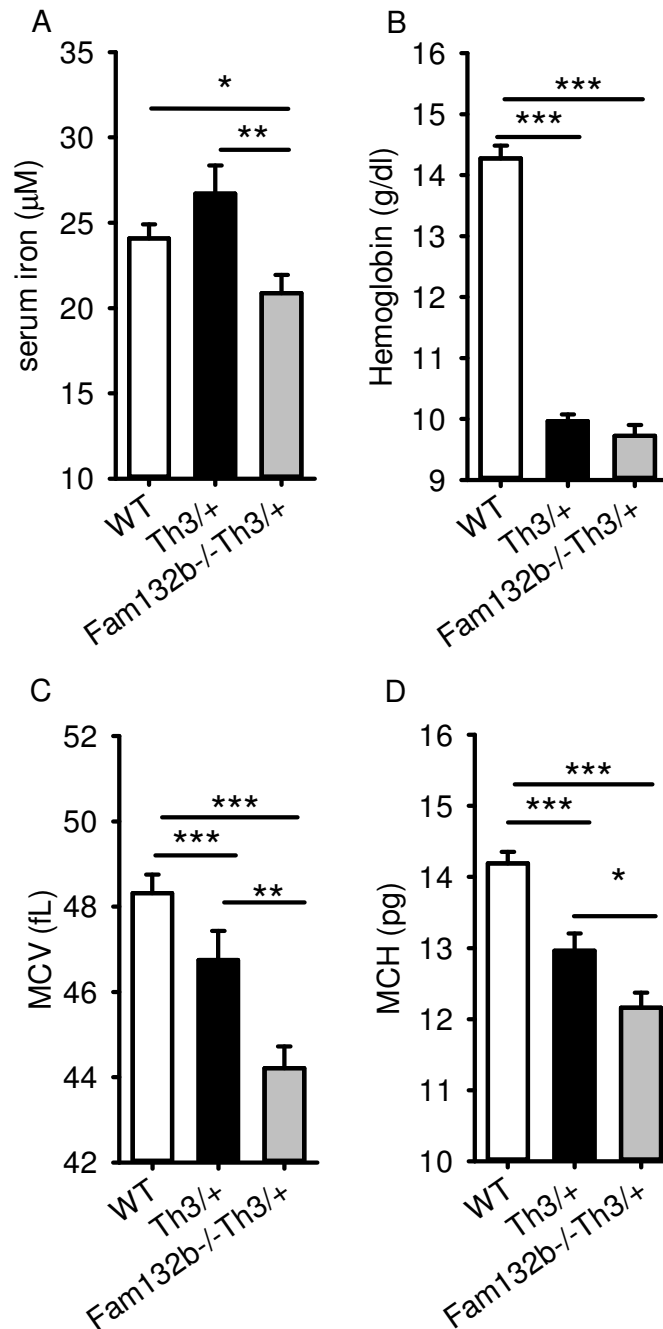

**Supplementary Figure 15: Ablation of ERFE in thalassemic mice decreases serum iron, erythrocyte mean corpuscular volume and mean corpuscular hemoglobin.** Serum iron (A), hemoglobin (B), MCV (C) and MCH (D) levels were determined in littermate wild-type (n=12),  $Hbb^{Th3/+}$  (n=12) and  $Fam132b^{-/-}, Hbb^{Th3/+}$  (n=18) mice at 6 weeks of age. Consistent with decreased iron overload, lower serum iron, MCV and MCH levels were observed in  $Fam132b^{-/-}, Hbb^{Th3/+}$  mice compared to their  $Hbb^{Th3/+}$  counterparts. Hemoglobin concentration was similar between  $Fam132b^{-/-}, Hbb^{Th3/+}$  and  $Hbb^{Th3/+}$  mice. Mean values  $\pm$  SEM in serum iron, hemoglobin, MCV and MCH levels were compared between each genotype by two-tailed Student t-test.
